# Supplementary material for: CITED2 affects leukemic cell survival by interfering with p53 activation
Source: PubMed Central journal article supplement (PMC5680917; doi:10.1038/cddis.2017.548), 2017-10-26
Supplement: cddis2017548x1.pdf [file cddis2017548x1.pdf]

## Supplementary Information

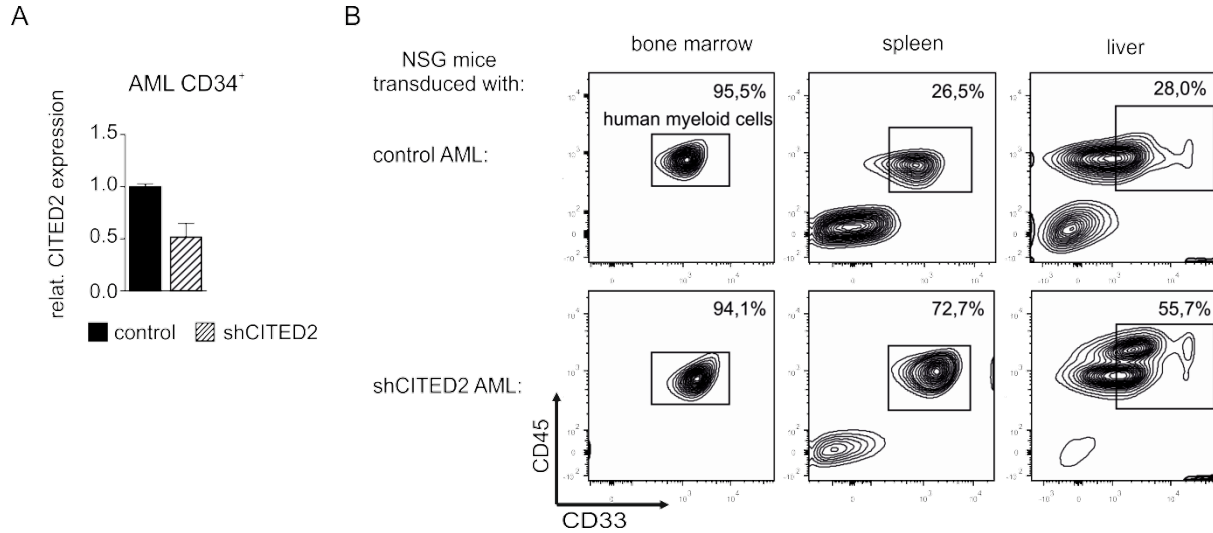

Supplementary Figure S1 (Supplement to Figure 1)

### Loss of CITED2 impairs leukemic cells survival

**(A)** Q-PCR analysis for CITED2 in AML CD34<sup>+</sup> cells transduced with a lentiviral construct for downregulation of CITED2. Error bars indicated triplicates of representative Q-PCR. **(B)** Representative FACS plot of cells isolated from NSG mice at day of sacrifice that have been previously transplanted with control- or shCITED2-transduced AML cells. The percentage of engrafted human myeloid cells in indicated organs is depicted.

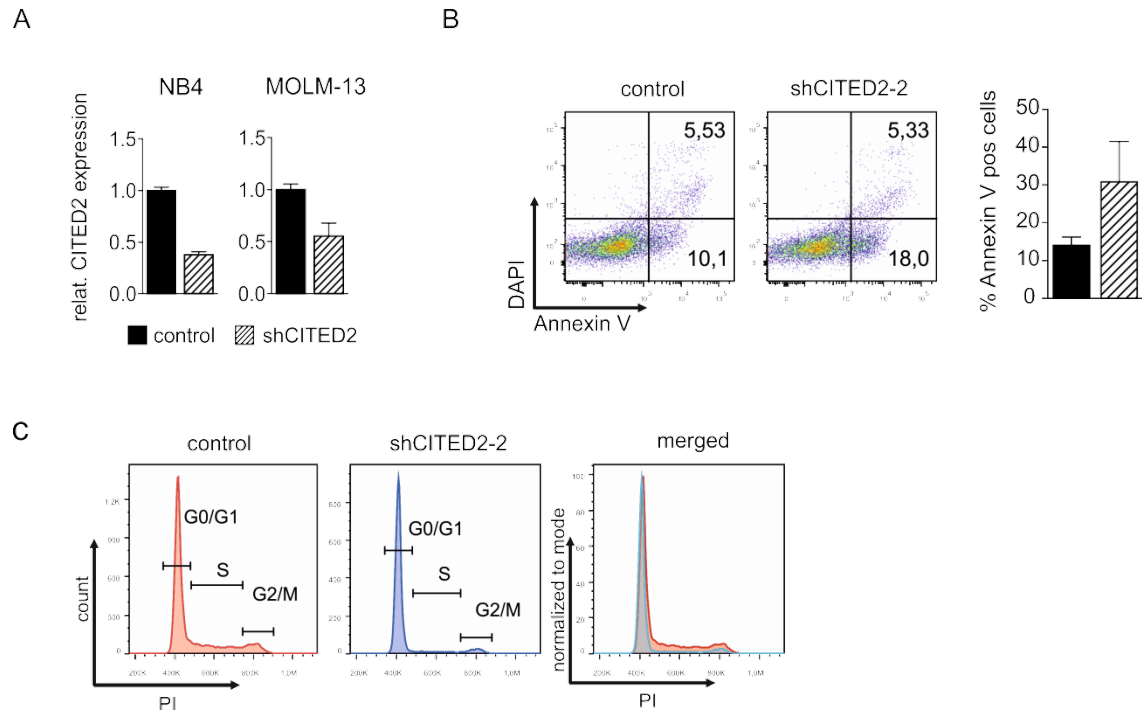

Supplementary Figure S2 (Supplement to Figure 2)

### Loss of CITED2 triggers apoptosis in leukemic cells

**(A)** Q-PCR analysis for CITED2 in NB4 and MOLM-13 cells transduced with a lentiviral construct for downregulation of CITED2. Error bars indicated triplicates of representative Q-PCR. **(B)** Annexin V staining of MOLM-13 cells 4 days after transduction with shCITED2-2. FACS plots and bar graph indicate the percentage of Annexin V positive cells. Error bars indicate s.d.; n=2. **(C)** Cell cycle analysis of control- and shCITED2-2-transduced MOLM-13 cells.

A

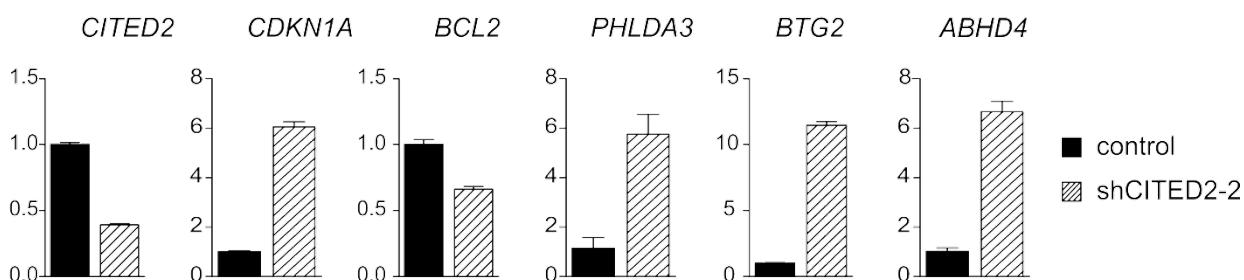

B

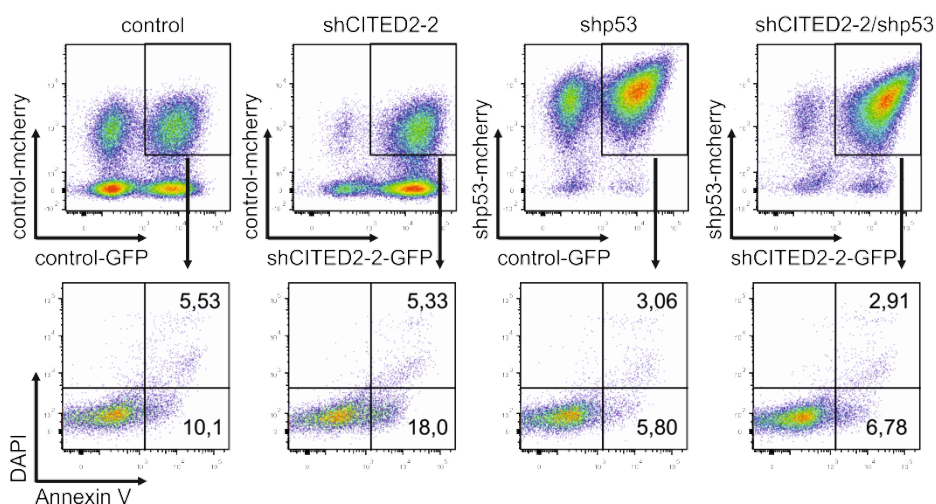

### Supplementary Figure S3 (Supplement to Figure 3)

#### Cell death upon knockdown of CITED2 is triggered by a p53-dependent pathway

(A) Q-PCR of p53 targets in NB4 cells 4-5 days after transduction with the shCITED2-2 vector. Error bars indicated triplicates of representative Q-PCR. (B) MOLM-13 cells were double-transduced with GFP and mCherry expressing shRNA vectors to knockdown CITED2 and/or p53 and stained for Annexin V 4-5 days after transduction. FACS plots indicating the percentage of Annexin V positive cells are shown.

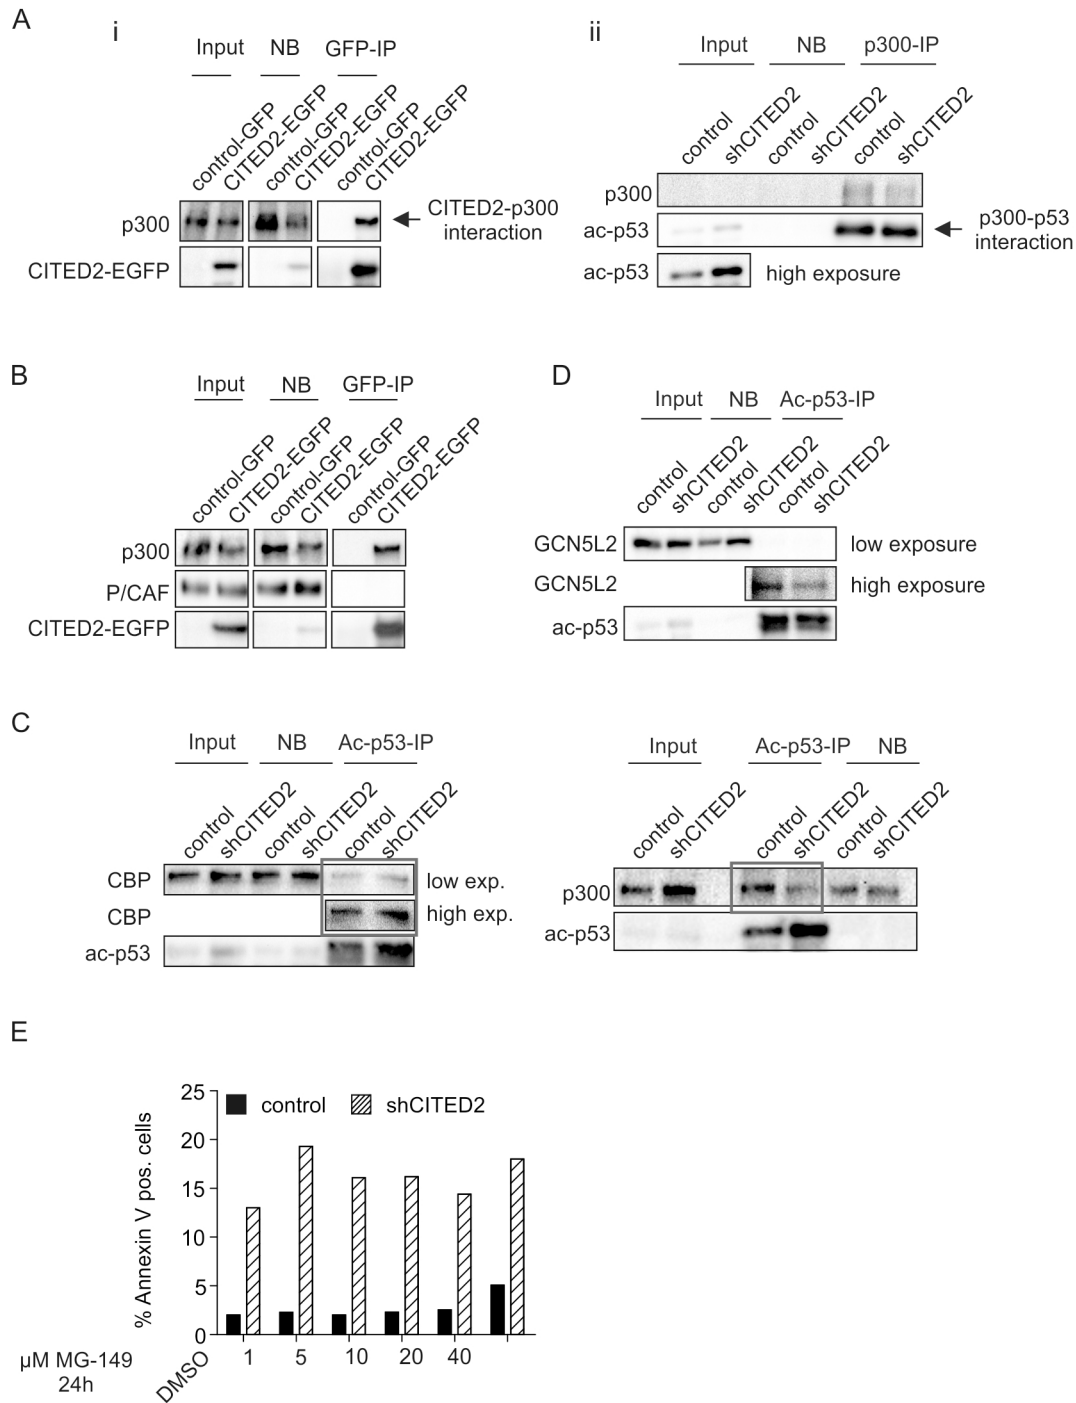

Supplementary Figure S4 (Supplement to Figure 4)

**Increased p53 activation in CITED2 knockdown cells is not directly mediated by CBP/p300**

(A)-(D) Western blot analysis of co-immunoprecipitation (IP) experiments of sorted GFP<sup>+</sup> NB4 cells with indicated antibodies (Ai) GFP co-IP of CITED2:EGFP-expressing cells. Black arrow indicates CITED2-

p300 interaction. **(Aii)** p300 co-IP of shCITED2-transduced cells. Black arrow indicates p300-p53 interaction. **(B)** GFP co-IP of CITED2:EGFP-expressing cells indicating that there is no interaction between CITED2 and P/CAF. **(C)** Ac-p53 co-IP of shCITED2-transduced cells. Red rectangle highlights the lanes indicating ac-p53-CBP interaction (left panel) or ac-p53-p300 interaction (right panel). **(D)** Ac-p53 co-IP of shCITED2-transduced NB4 cells demonstrating that there is no change in p53-GCN5L2 interaction upon CITED2 knockdown. **(E)** Percentage of Annexin V positive cells of control- or shCITED2-transduced MOLM13 cells after incubation with indicated concentration of the inhibitor MG-149 for 24h.

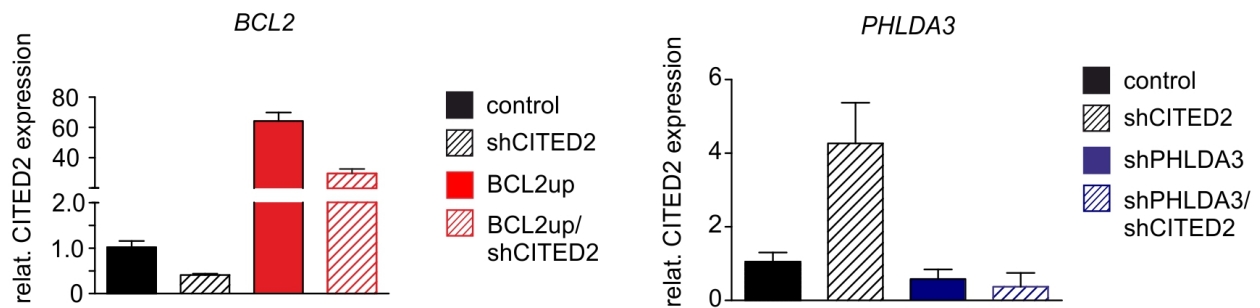

Supplementary Figure S5 (Supplement to Figure 5)

**CITED2 knockdown mediates decrease in AKT-signaling in a p53/PHLDA3/BCL2 dependent manner**

Q-PCR for BCL2 (left panel) and PHLDA3 (right panel) in MOLM-13 cells that were transduced with a short hairpin construct against *CITED2* in combination with a lentiviral construct for overexpression of BCL2 or a short hairpin against *PHLDA3*. Error bars indicated triplicates of representative Q-PCR.

### Supplementary Table 1

Table lists primer sequences that have been used for Q-PCR .

| <b>name</b> | <b>forward primer 5'-3'</b> | <b>reverse primer 5'-3'</b>    |
|-------------|-----------------------------|--------------------------------|
| RPL27       | TCCGGACGCAAAGCTGTCATCG      | TCTTGCCCATGGCAGCTGTCAC         |
| RPS11       | AAGATGGCGGACATTCAGAC        | AGCTTCTCCTTGCCAGTTTC           |
| CITED2      | CTTTGCACGCCAGGAAGGTC        | CGCCGTAGTGTATGTGCTCG           |
| CDKN1A      | ACTAGGCGGTTGAATGAGAG        | AGGAAGTAGCTGGCATGAAG           |
| p53         | GAGATGTTCCGAGAGCTGAATGAGGC  | TCTTGAACATGAGTTTTTTATGGCGGGAGG |
| BCL2        | GAGGCTGGGATGCCTTTGTG        | GGGCCAAACTGAGCAGAGTC           |
| PHLDA3      | GGACCCTCGTGTCTAAACC         | CACAAGCCAGAGGGAACAAC           |
| SOX4        | GACCTGAACCCCAGCTCAAA        | GATCATCTCGCTCACCTCGG           |
| TXNIP       | TTGCGGAGTGGCTAAAGTG         | TCACCTGTTGGCTGGTCTTC           |
| BTG2        | TGGGCTTAGGGAACCATCTCT       | TTCAGCCAAGGAATACATGCAA         |
| ABHD4       | GGAAGCCAGGATCCTCCAGTGTCT    | CCAAGGGGGTGCGGTCGTTT           |
| CBP         | AGCTTGCAGAGGTCTTTGAG        | TCCCATAGCAGCACAAAGTC           |
| p300        | CCTTCCCAGCCTCAAACACTAC      | CAGCCATCACAGACGAATCC           |
| HPRT        | AGTTCTGTGGCCATCTGCTTAG      | CGCCCAAAGGGAAGTATAGTC          |

### Supplementary Table 2

Table lists short hairpin sequences used for RNAi-mediated knockdown of the indicated target genes

| <b>Short hairpin name</b> | <b>Target gene</b> | <b>sequence</b>        |
|---------------------------|--------------------|------------------------|
| shCITED2                  | <i>CITED2</i>      | AAATCCGGCATGTAGTGGTTG  |
| shCITED2-2                | <i>CITED2</i>      | ATGAACTGGGAGTTGTTAAAC  |
| shp300                    | <i>EP300</i>       | TAATTCATCTGGTAAGTCG    |
| shCBP                     | <i>CREBBP</i>      | TCGCCACGTCCCTTAGTAACCA |
| shPHLDA3                  | <i>PHLDA3</i>      | CAGCCTGGTACCAAAGGAGTA  |
